# Supplementary material for: Three unique two-fold interpenetrated three-dimensional networks with PtS-type topology constructed from [M(CN)4]2−(M = Ni, Pd, Pt) as “square-planar” building blocks
Source: Royal Society of Chemistry journal article supplement (doi:10.1039/b917262a), 2009-12-17
Supplement: b917262a.pdf [file b917262a.pdf]

## Supporting Information

### **Three unique two-fold interpenetrated three-dimensional networks with PtS-type topology constructed from $[M(CN)_4]^{2-}$ ( $M = Ni, Pd, Pt$ ) as “square-planar” building blocks**

Ai-Hua Yuan,<sup>\*a</sup> Run-Qin Lu,<sup>a</sup> Hu Zhou,<sup>a</sup> Ying-Ying Chen,<sup>a</sup> Yi-Zhi Li<sup>b</sup>

---

<sup>a</sup>School of Material Science and Engineering, Jiangsu University of Science and Technology, Zhenjiang 212003, P. R. China. E-mail: [aihuayuan@163.com](mailto:aihuayuan@163.com)

<sup>b</sup>Coordination Chemistry Institute and the State Key Laboratory of Coordination Chemistry, Nanjing University, Nanjing 210093, P. R. China

† Electronic supplementary information (ESI) available: Additional crystallographic diagrams, TGA diagram and adsorption isotherm. See DOI: ?

**Section S1: Single crystal X-ray diffraction analysis for 1-3.**

The single crystals of **1-3** were very easy to pulverize to powder after they were removed from the mother liquor and exposed in air. Therefore, as soon as the well-shaped single crystal was removed from the mother liquor, it was immediately introduced into a glass capillary having an open end and fixed. Then the capillary was soon filled with the mother liquor, and sealed for single-crystal X-ray structure determination at 291(2) K.

Diffraction data for **1-3** were collected on a Bruker Smart Apex II CCD diffractometer equipped with MoK $\alpha$  ( $\lambda = 0.71073$  Å) radiation. Diffraction data analysis and reduction were performed within SMART and SAINT (*SMART, SAINT and XPREP. Area detector and data integration and reduction software*; Bruker Analytical Instruments Inc.: Madison, WI, 1995.). Correction for Lorentz, polarization, and absorption effects were performed within SADABS (G.M. Sheldrick. *SADABS. Empirical adsorption correction program for area detector data*; University of Göttingen: Göttingen, Germany, 1996.). Structures were solved using Patterson method within SHELXL-97 and refined using SHELXL-97 (*SHELXL97. Program for crystal structural solution and refinement*; Bruker Analytical Instruments Inc.: Madison, WI, 1997.).

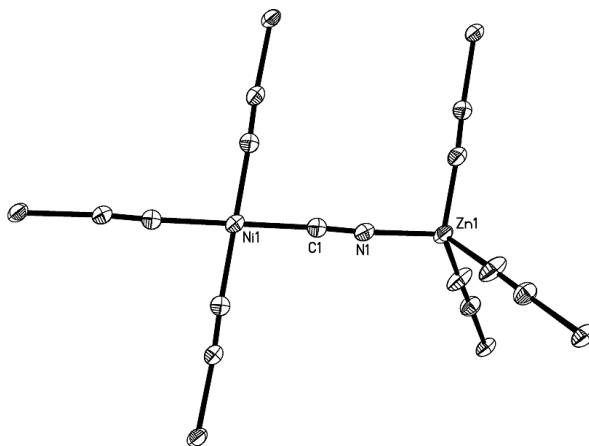

(a)

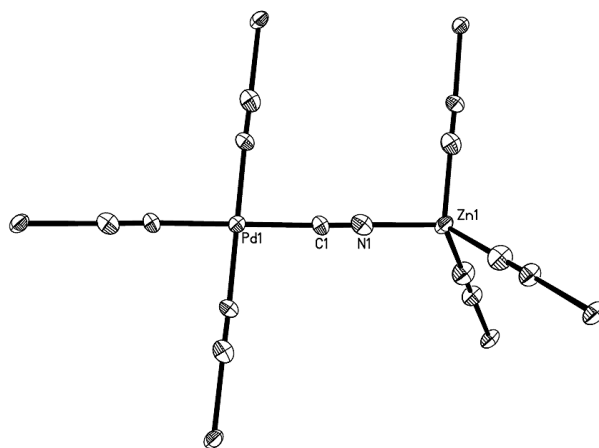

(b)

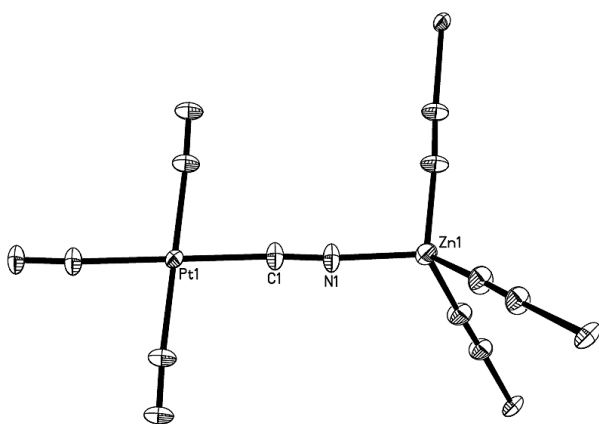

(c)

**Figure S1.** ORTEP diagrams of (a) **1**, (b) **2**, and (c) **3**. Displacement ellipsoids are drawn at the 30% probability level.

### **Section S2:** Thermogravimetric analysis.

Thermogravimetric analysis (TGA) was carried out on a TA Instrument Perkin-Elmer Diamond analyzer to determine the thermal stability of **1**. The temperature was ramped at 2 °C/min from 20 to 730 °C under nitrogen atmosphere. After removed from the mother liquor, the samples were immediately performed on a TGA analyzer. Therefore, the negligible weight loss (1.0%) until 100°C can be attributed to the fact that the samples were not dried completely before TGA experiment.

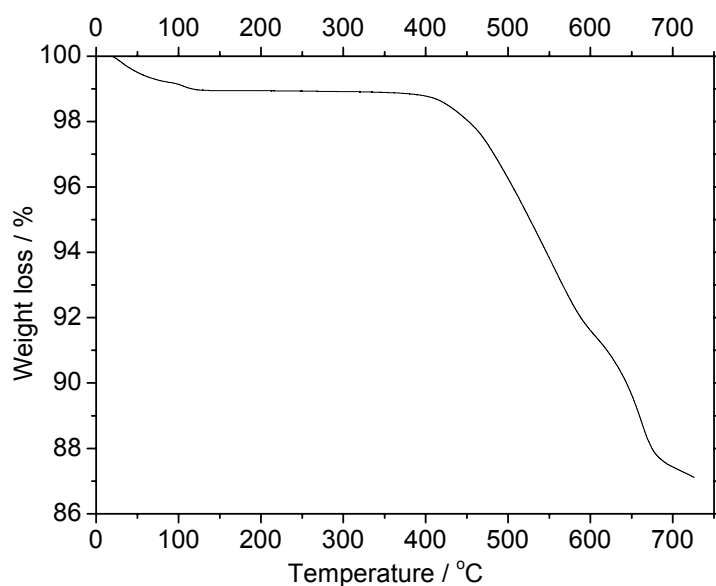

**Figure S2.** Thermogravimetric curve of **1**.

### ***Section S3: Nitrogen adsorption of 1.***

A nitrogen adsorption isotherm of **1** was measured volumetrically at 77 K with 99.99% N<sub>2</sub> on a Micromeritics ASAP 2020 M+C. The BET plot is shown in Figure S3, and the parameters presented in Tables S1. Data of N<sub>2</sub> adsorption and desorption for **1** is listed in Table S2.

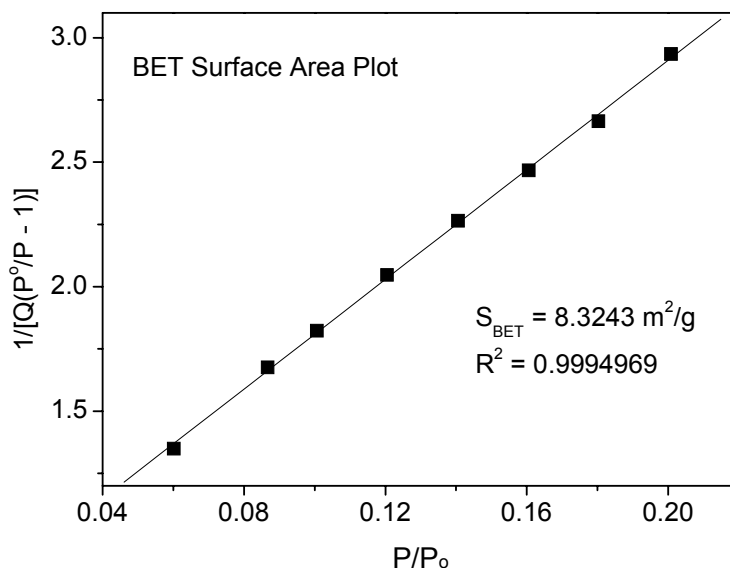

**Figure S3.** BET surface area plot for **1**.

**Table S1.** Fitted parameters for the BET model.

|                                |                                   |
|--------------------------------|-----------------------------------|
| BET Surface Area               | 8.3243 ± 0.1023 m <sup>2</sup> /g |
| Slope                          | 11.014160 ± 0.142692 g/mmol       |
| Y-Intercept                    | 0.707367 ± 0.019808 g/mmol        |
| C                              | 16.570634                         |
| Q <sub>m</sub>                 | 0.08531 mmol/g                    |
| Correlation Coefficient        | 0.9994969                         |
| Molecular Cross-Sectional Area | 0.1620 nm <sup>2</sup>            |

**Table S2.** Nitrogen isotherm data for **1**.

| Relative pressure (p/p <sub>0</sub> ) | Absolute pressure (kPa) | Quantity adsorbed (mmol/g) |
|---------------------------------------|-------------------------|----------------------------|
| 0.000071887                           | 0.0072809               | 0.00178                    |
| 0.000563641                           | 0.0570906               | 0.00592                    |
| 0.001087136                           | 0.1101189               | 0.00795                    |
| 0.009675765                           | 0.9801024               | 0.02200                    |
| 0.030254380                           | 3.0646804               | 0.03476                    |
| 0.060169064                           | 6.0950644               | 0.04743                    |
| 0.086692976                           | 8.7821279               | 0.05665                    |
| 0.100647980                           | 10.1959809              | 0.06138                    |
| 0.120494388                           | 12.2067169              | 0.06693                    |
| 0.140544459                           | 14.2381604              | 0.07222                    |
| 0.160604620                           | 16.2706007              | 0.07753                    |
| 0.180303009                           | 18.2665542              | 0.08254                    |
| 0.200813611                           | 20.3447427              | 0.08563                    |
| 0.244484177                           | 24.7695386              | 0.09389                    |
| 0.302186115                           | 30.6160928              | 0.10242                    |
| 0.353533168                           | 35.8187830              | 0.11061                    |
| 0.400344676                           | 40.5623230              | 0.11586                    |
| 0.449895041                           | 45.5835421              | 0.12127                    |
| 0.499912915                           | 50.6520026              | 0.12591                    |
| 0.550054335                           | 55.7338002              | 0.13022                    |
| 0.599816928                           | 60.7767094              | 0.13471                    |
| 0.649778049                           | 65.8398603              | 0.13862                    |
| 0.700156400                           | 70.9445320              | 0.14401                    |

Supplementary Material (ESI) for CrystEngComm  
This journal is © The Royal Society of Chemistry 2009

|                    |                    |                |
|--------------------|--------------------|----------------|
| 0.750286640        | 76.0240634         | 0.14982        |
| 0.800130179        | 81.0745444         | 0.15933        |
| 0.820404841        | 83.1289088         | 0.16355        |
| 0.850150718        | 86.1429601         | 0.17163        |
| 0.875269082        | 88.6881209         | 0.18097        |
| 0.900080830        | 91.2022132         | 0.19587        |
| 0.925312910        | 93.7588964         | 0.21121        |
| 0.950131645        | 96.2736967         | 0.23566        |
| 0.974890630        | 98.7824428         | 0.29010        |
| 0.980418879        | 99.3426019         | 0.31913        |
| 0.990307536        | 100.3445868        | 0.39162        |
| <b>0.994861406</b> | <b>100.8060155</b> | <b>0.46351</b> |
| 0.981270064        | 99.4288497         | 0.34317        |
| 0.969022518        | 98.1878464         | 0.28619        |
| 0.944745863        | 95.7279732         | 0.23959        |
| 0.926045641        | 93.8331416         | 0.22184        |
| 0.900576733        | 91.2524613         | 0.20535        |
| 0.875476598        | 88.7091478         | 0.19597        |
| 0.850391161        | 86.1673233         | 0.18825        |
| 0.825544559        | 83.6496994         | 0.18227        |
| 0.800272244        | 81.0889394         | 0.17842        |
| 0.754471896        | 76.4481415         | 0.17106        |
| 0.700264816        | 70.9555174         | 0.16145        |
| 0.650237411        | 65.8864060         | 0.15510        |
| 0.600400256        | 60.8365719         | 0.14939        |
| 0.550405656        | 55.7707845         | 0.14323        |
| 0.500478516        | 50.7118325         | 0.13655        |
| 0.450478174        | 45.6454633         | 0.13026        |
| 0.400569826        | 40.5884155         | 0.12318        |
| 0.350584422        | 35.5235598         | 0.11536        |
| 0.300326573        | 30.4310982         | 0.10555        |
| 0.250643710        | 25.3968980         | 0.09569        |
| 0.200416096        | 20.3075001         | 0.08354        |
| 0.140712118        | 14.2578935         | 0.06718        |

---

Supplementary Material (ESI) for CrystEngComm  
This journal is © The Royal Society of Chemistry 2009
